# Supplementary material for: Cost-effectiveness of Short-Course Radiation Therapy vs Long-Course Chemoradiation for Locally Advanced Rectal Cancer
Source: PubMed Central journal article supplement (PMC6481445; doi:10.1001/jamanetworkopen.2019.2249), 2019-04-12

## Supplementary Online Content

Raldow AC, Chen AB, Russell M, et al. Cost-effectiveness of short-course radiation therapy vs long-course chemoradiation for locally advanced rectal cancer. *JAMA Network Open*. 2019;2(4):e192249. doi:10.1001/jamanetworkopen.2019.2249

**eFigure 1.** Two-Way Sensitivity Analysis (Willingness to Pay = \$100,000) Varying the Costs of SCRT and LCRT

**eFigure 2.** Probabilistic Sensitivity Analysis (1,000,000 Trials) Varying All Uncertain Parameters of the Model Simultaneously

This supplementary material has been provided by the authors to give readers additional information about their work.

**eFigure 1. Two-way sensitivity analysis (willingness to pay = \$100,000) varying the costs of SCRT and LCRT.** The costs of SCRT and LCRT were \$7,223 and \$19,311, respectively, in the basic model. The figure shows the most cost-effective approach (SCRT in red or LCRT in blue) depending on the costs of SCRT and LCRT. Abbreviations: LCRT, long-course chemoradiation; SCRT, short course radiation therapy

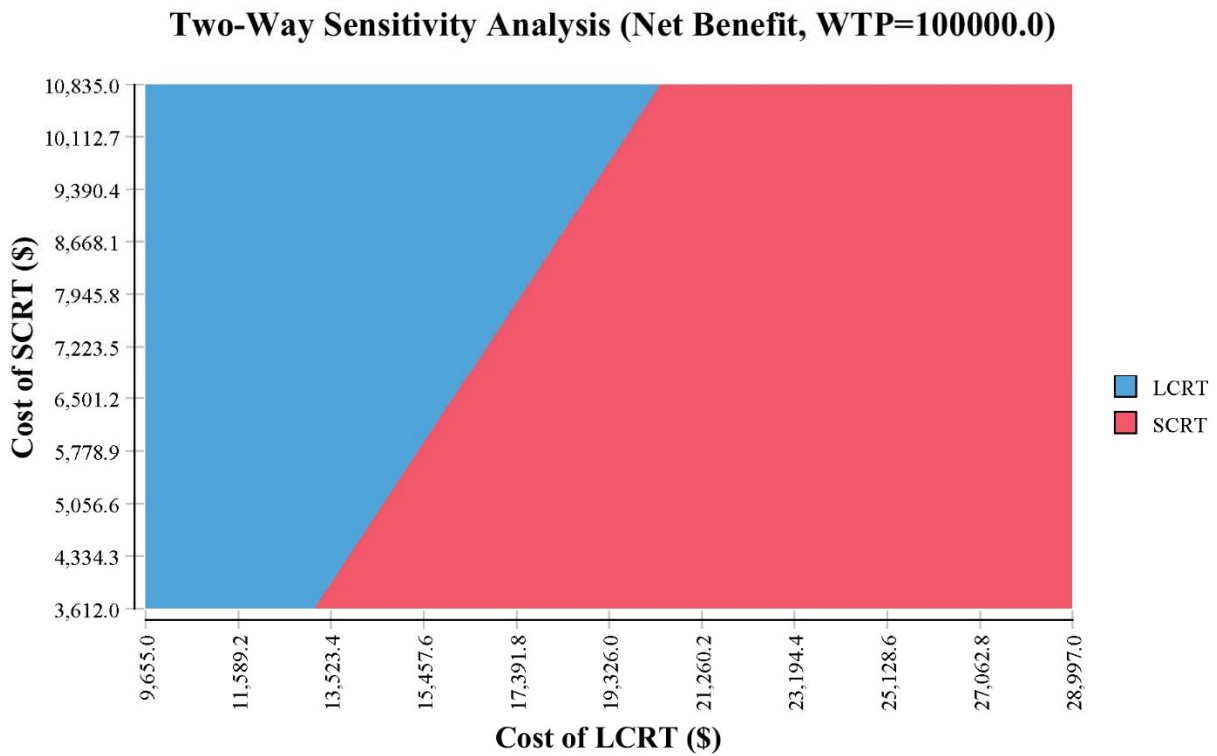

**eFigure 2. Probabilistic sensitivity analysis (1,000,000 trials) varying all uncertain parameters of the model simultaneously.** The graph indicates the percentage of trials in which a strategy is cost-effective at various willingness to pay thresholds. For example, at a willingness to pay of \$100,000 per quality-adjusted life year, SCRT was cost effective in 63.5% of simulations. Abbreviations: LCRT, long-course chemoradiation; SCRT, short course radiation therapy

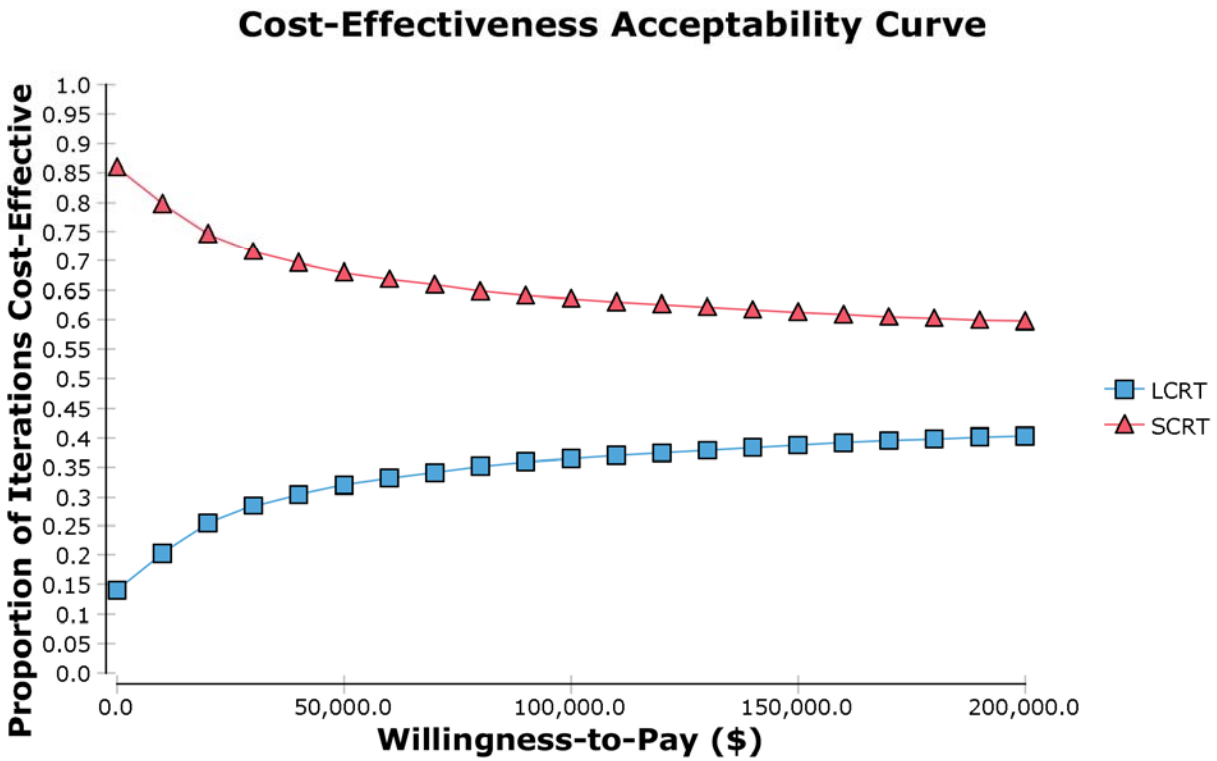

Supplement: jamanetwopen-2-e192249-s001.pdf [file jamanetwopen-2-e192249-s001.pdf]
